# Supplementary material for: Selenoneine Ameliorates Hepatocellular Injury and Hepatic Steatosis in a Mouse Model of NAFLD
Source: PubMed Central journal article supplement (PMC7353312; doi:10.3390/nu12061898), 2020-06-26
Supplement: nutrients-12-01898-s001.pdf [file nutrients-12-01898-s001.pdf]

Supplementary Materials

Table S1. Primer sequences for real time PCR.

| Gene                            | Sequence (forward)         | Sequence (reverse)       |
|---------------------------------|----------------------------|--------------------------|
| <i>Acc1</i>                     | ACAGTGAAGGCTTACGTCTG       | TGTGGACGATGGAGTCCATG     |
| <i>Bsep</i>                     | TGGCAGAAGCAAAGGGTAG        | GCAGGATCTTGGGTTCCGT      |
| <i>Cyp7a1</i>                   | AGCAACTAAACAACCTGCCAGTACTA | GTCCGGATATTCAAGGATGCA    |
| <i>Fasn</i>                     | CGGTCTGGAAAGCTGAAGGATC     | CGGAGTGAGGCTGGGTTGA      |
| <i>Gpx1</i>                     | CAGGAGAATGGCAAGAATGA       | GAAGGTAAAGAGCGGGTGAG     |
| <i>Gpx2</i>                     | ATCAAACGGCTCCTCAAAGT       | GGGACGATATTCAGGGAATG     |
| <i>Gpx4</i>                     | GCAGGAGCCAGGAAGTAATC       | GGCTGGACTTTCATCCATT      |
| <i>Gsta1</i>                    | CAGCCTGGCAGCCAGAGA         | TCTGTGGCTCCATCAATGCA     |
| <i>Gsta2</i>                    | ACATGAAGGAGAGAGCCCTGAT     | GCAGTCTTGGCTTCTCTTTGGT   |
| <i>Hmox1</i>                    | CCTCACTGGCAGGAAATCATC      | CCTGGTGGAGACGCTTTACATA   |
| <i>IL-1<math>\beta</math></i>   | GCACTACAGGCTCCGAGATGAAC    | TTGTCGTTGCTTGGTTCTCCTTGT |
| <i>IL-6</i>                     | CCACTCACCTCTTCAGAA         | GCGCAAATGAGATGAGT        |
| <i>Ppar<math>\alpha</math></i>  | CCTCAGGGTACCACTACGGAGT     | GCCGAATAGTTCGGCCGAA      |
| <i>Scd1</i>                     | AGTTAACCACTGAATGCGAGG      | GAGGTCCATTAGCACTTGCC     |
| <i>Selenop</i>                  | CCTTGTTTGCCTTACTCCTTCC     | TTTGTGTGGTGTGGTGGTGG     |
| <i>Srebp1c</i>                  | GGAGCCATGGATTGCACATT       | GAAGTCACTGTCTTGGTTGTTG   |
| <i>Tnf<math>\alpha</math></i>   | TGTCTACTGAACTTCGGGGTGATC   | GGTTGTCTTTGAGATCCATGCCGT |
| <i>Txnrd1</i>                   | AGGAACTCTGTCAGGACAGCCAGTA  | GCCAGCATGTTACGGTCA       |
| <i><math>\beta</math>-actin</i> | GCCAACACAGTGCTGTCTG        | CCTGCTTGCTGATCCACATC     |
